# Supplementary material
Source: PubMed Central journal article supplement (PMC5238941)
Supplement: NIHMS70666-supplement-Supplementary_material.pdf [file NIHMS70666-supplement-Supplementary_material.pdf]

## An NPF Transporter Exports a Central Monoterpene Indole Alkaloid Intermediate from the Vacuole

Richard M. E. Payne,<sup>a</sup> Deyang Xu,<sup>b,c</sup> Emilien Foureau,<sup>d</sup> Marta Ines Soares Teto Carqueijeiro,<sup>d</sup> Audrey Oudin,<sup>d</sup> Thomas Dugé de Bernonville,<sup>d</sup> Vlastimil Novak,<sup>b,c</sup> Meike Burow,<sup>b,c</sup> Carl-Erik Olsen,<sup>c</sup> D. Marc Jones,<sup>e</sup> Evangelos C. Tatsis,<sup>a</sup> Ali Pendle,<sup>f</sup> Barbara Ann Halkier,<sup>c</sup> Fernando Geu-Flores,<sup>c,g</sup> Vincent Courdavault,<sup>d</sup> Hussam Hassan Nour-Eldin,<sup>b,c</sup> Sarah E. O'Connor<sup>a\*</sup>

<sup>a</sup> The John Innes Centre, Department of Biological Chemistry, Norwich Research Park, Norwich NR4 7UK, UK

<sup>b</sup> DynaMo Center, Department of Plant and Environmental Sciences, Faculty of Science, University of Copenhagen, 40 Thorvaldsensvej, DK-1871 Frederiksberg C, Denmark.

<sup>c</sup> Copenhagen Plant Science Center, Department of Plant and Environmental Sciences, Faculty of Science, University of Copenhagen, 1871 Frederiksberg C, Denmark

<sup>d</sup> Université François-Rabelais de Tours, EA2106 Biomolécules et Biotechnologies Végétales, Département de Biologie et Physiologie Végétales, UFR Sciences et Techniques, Parc de Grandmont 37200 Tours, France

<sup>e</sup> The John Innes Centre, Department of Computational and Systems Biology, Norwich Research Park, Norwich NR4 7UK, UK

<sup>f</sup> The John Innes Centre, Department of Cell and Developmental Biology, Norwich Research Park, Norwich NR4 7UK, UK

<sup>g</sup> Section for Plant Biochemistry, Department of Plant and Environmental Sciences, Faculty of Science, University of Copenhagen, 1871 Frederiksberg C, Denmark

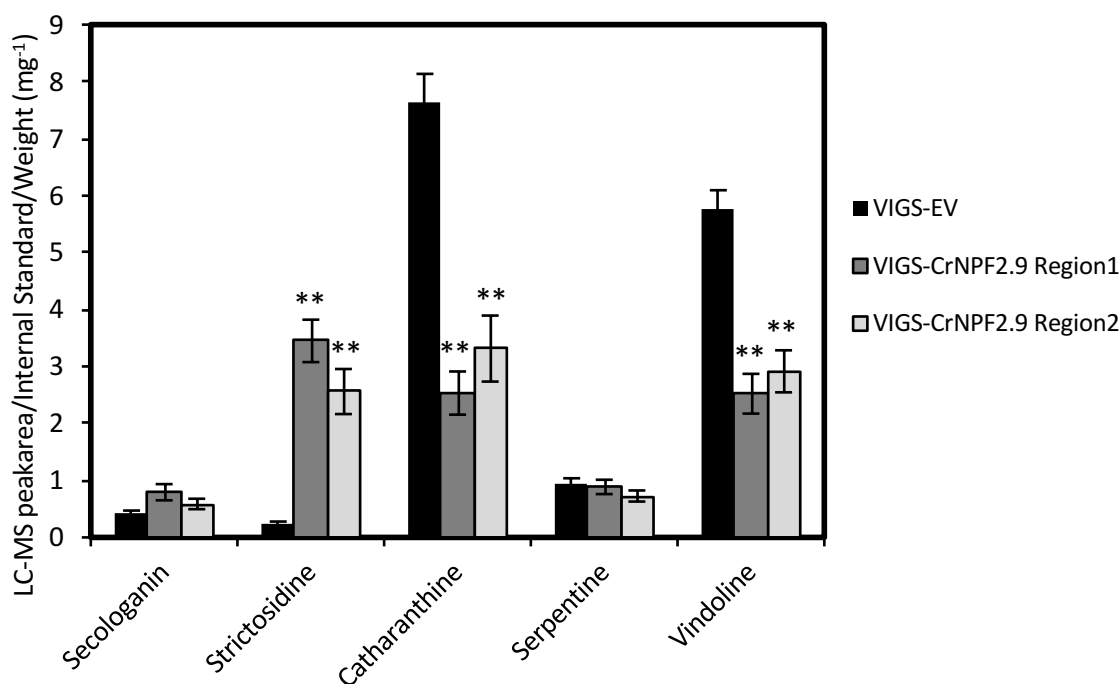

**Supplementary Figure 1. *In planta* silencing of CrNPF2.9 using additional VIGS vectors harbouring alternative gene fragment.** To ensure that the response to silencing was specific, an additional gene region was selected and tested for CrNPF2.9. Alkaloid profile for leaf tissue transformed with vector VIGS-CrNPF2.9 Region1, VIGS-CrNPF2.9 Region 2 relative to empty vector control tissue in Little Bright Eyes (VIGS-CrNPF2.9 Region1 (n= 10), VIGS-CrNPF2.9 Region2 (n= 11), VIGS-EV (n=9)) \*\* p<0.01. All data show are mean  $\pm$  SEM.

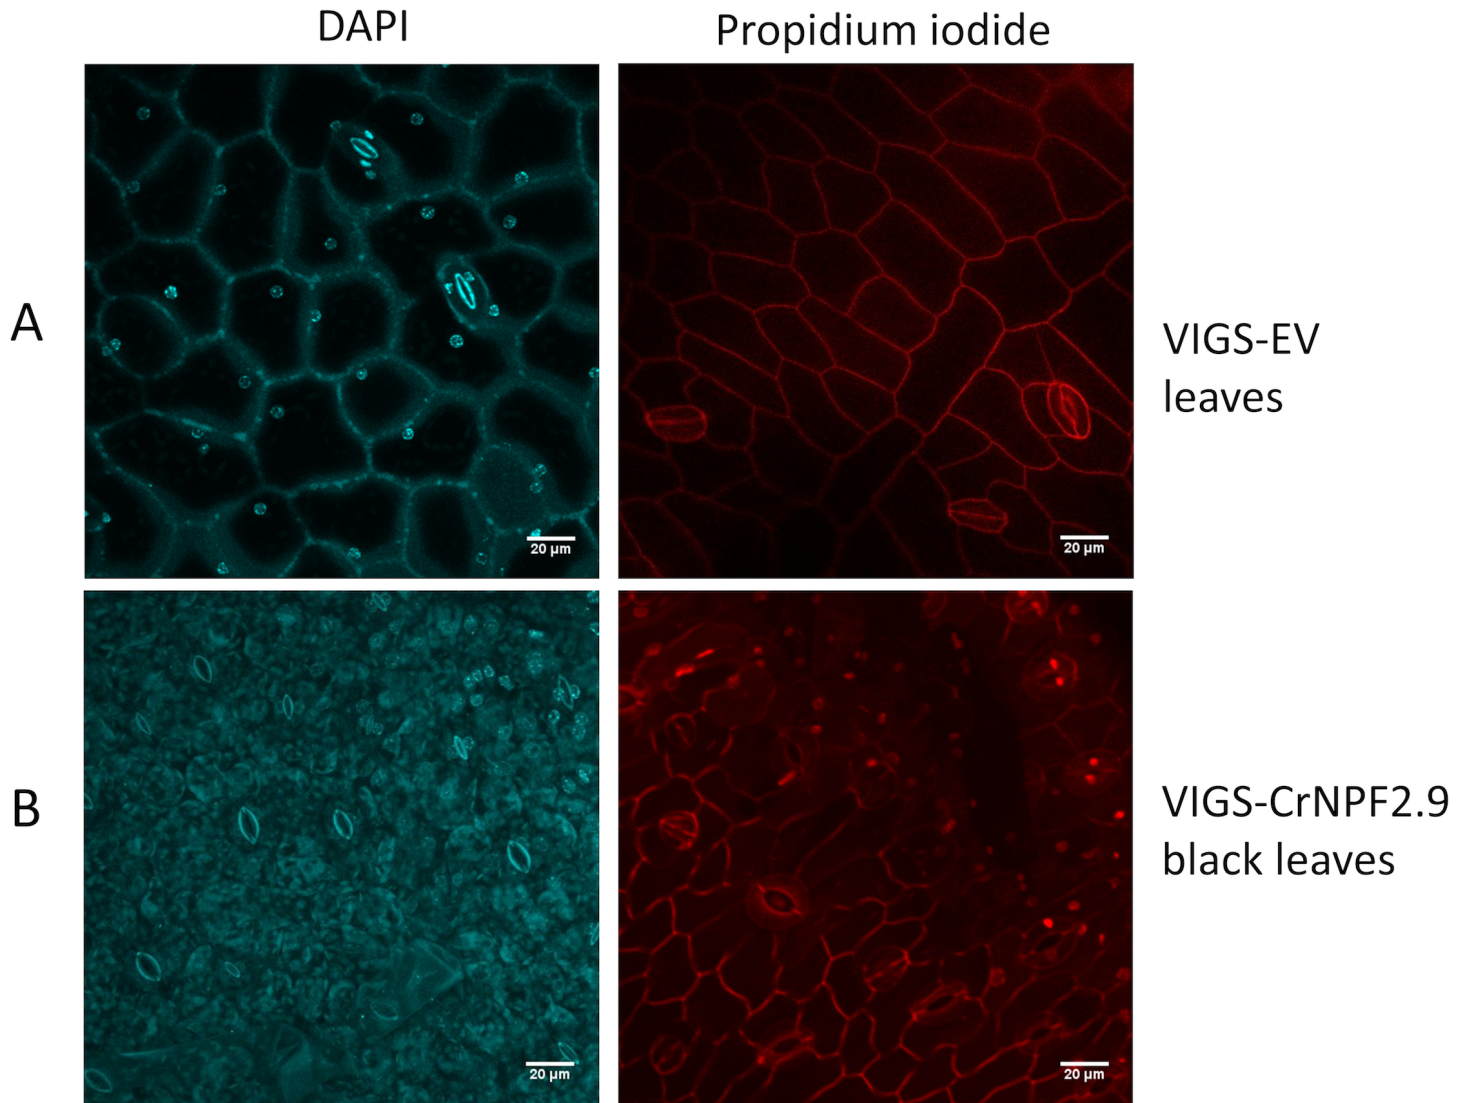

**Supplementary Figure 2. Confocal microscopy of VIGS-EV leaf tissue and VIGS-CrNPF2.9 leaf tissue displaying the black phenotype. A.** DAPI and propidium iodide staining of VIGS-EV leaf tissue **B.** DAPI and propidium iodide staining of VIGS-CrNPF2.9 leaf tissue.

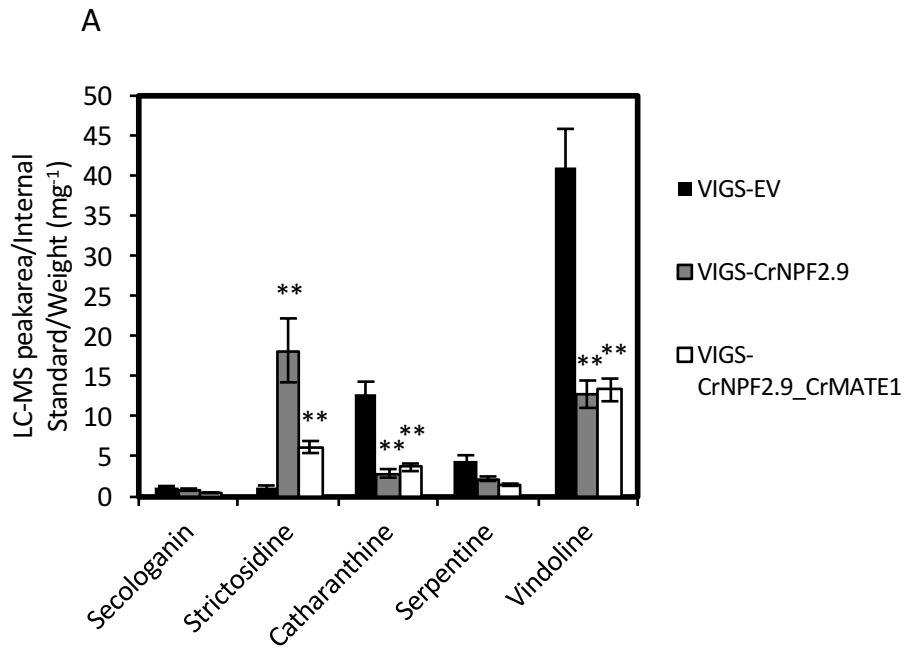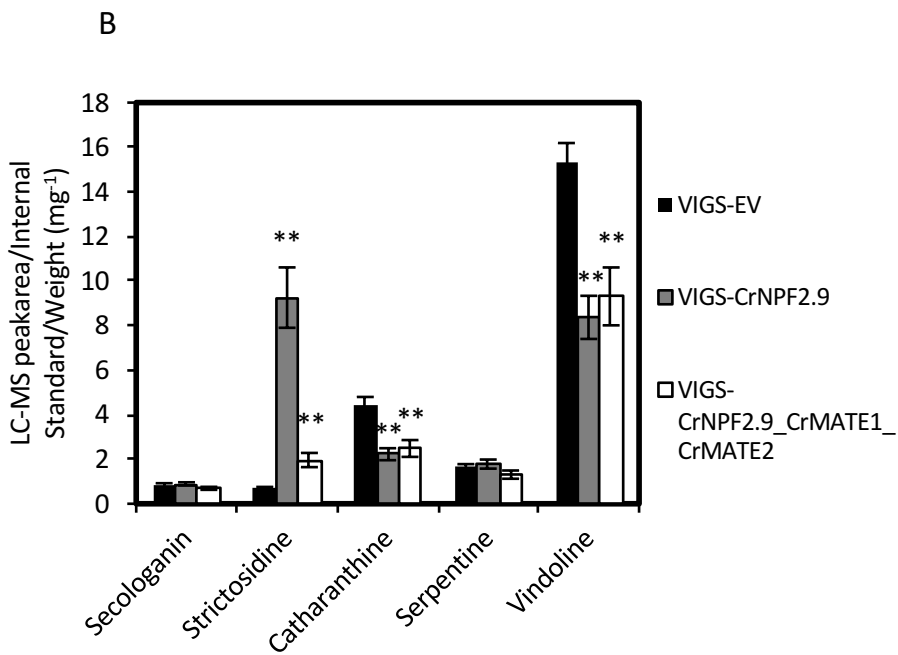

**Supplementary Figure 3. Combinatorial (simultaneous) *in planta* silencing of CrNPF2.9, CrMATE1 and CrMATE2.**

C

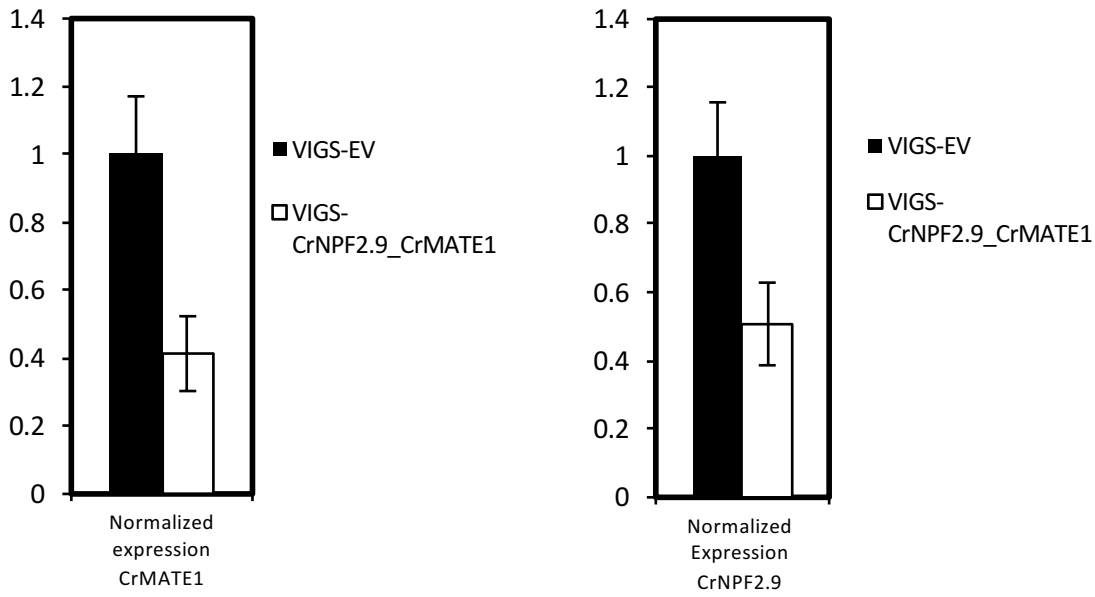

D

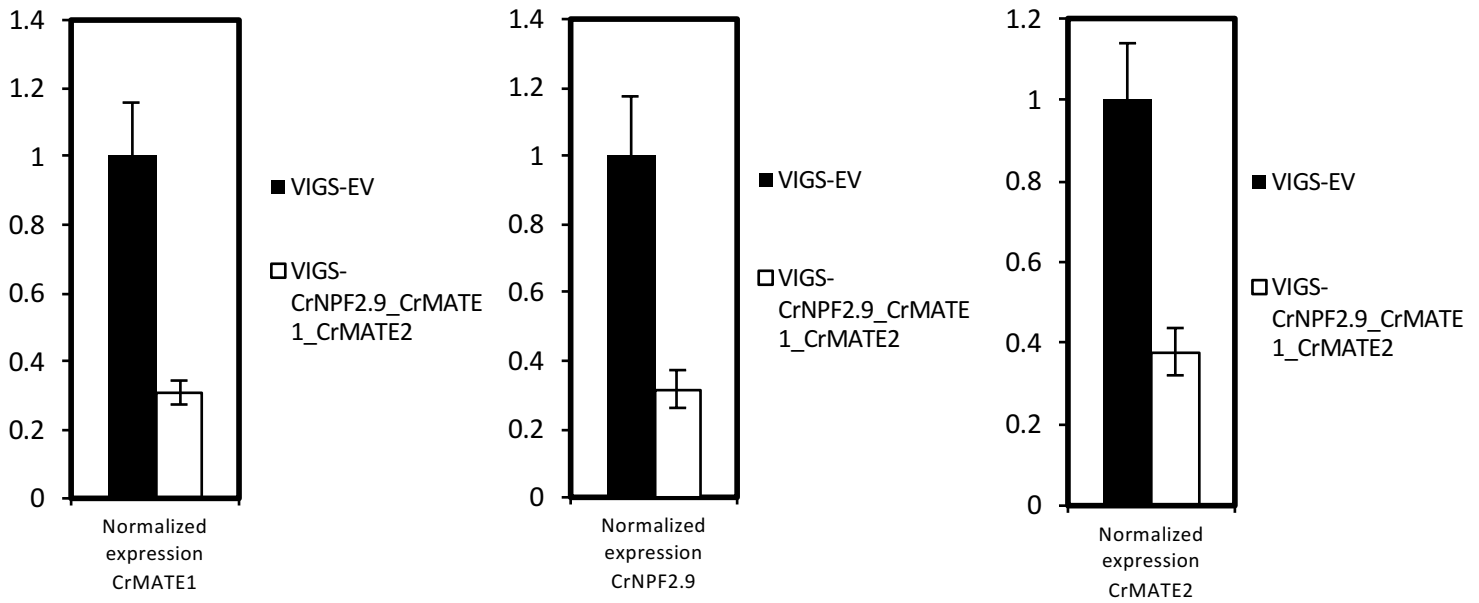

**Supplementary Figure 3. Combinatorial (simultaneous) *in planta* silencing of CrNPF2.9, CrMATE1 and CrMATE2.**

**Supplementary Figure 3. Combinatorial (simultaneous) *in planta* silencing of CrNPF2.9, CrMATE1 and CrMATE2.** **A.** Alkaloid profile for tissue that has been transformed with a VIGS vector that targets both-CrNPF2.9 (Region 1) and CrMATE1 (Region 1) relative to empty vector control tissue, and tissue transformed with only VIGS-CrNPF2.9 (Region 1) (VIGS-CrNPF2.9 Region1 (n = 10), VIGS-CrNPF2.9-CrMATE1 double (n = 11), VIGS-EV (n = 9)) \*\* p < 0.01. **B.** Alkaloid profile for tissue that has been transformed with a VIGS vector that targets the three genes CrNPF2.9 (Region 1), CrMATE1 (Region 1) and CrMATE2 relative to empty vector control tissue and tissue transformed with only VIGS-CrNPF2.9 (Region 1) (VIGS-CrNPF2.9 Region1 (n = 12), VIGS-CrNPF2.9-CrMATE1-CrMATE2 triple (n = 15), VIGS-EV (n = 11)) \*\* p < 0.01. **C.** Normalized expression levels of the CrNPF2.9 and CrMATE1 genes in empty vector control tissue and the double silenced CrNPF2.9\_CrMATE1 tissue as measured by qPCR (VIGS-CrNPF2.9\_CrMATE1 (n = 8) VIGS-EV (n = 8)). All data shown are mean  $\pm$  SEM. **D.** Normalized expression of CrNPF2.9, CrMATE1 and CrMATE2 genes in empty vector and the triple silenced CrNPF2.9-CrMATE1-CrMATE2 tissue (VIGS-CrNPF2.9-CrMATE1-CrMATE2 (n = 8), VIGS-EV (n = 8)). All data shown are mean  $\pm$  SEM.

**A**

```

AtGTR1      MKSRVILNHRDRDRDKNHNNTNHYTQVDTMERKPLEVEPSTTTTNDTVV
AtNRT1.1    MSLPE-----TKSDDILL
CrNPF2.9    MGD-----TEAQ-
NAXT        MASSV-----TGDAETAI

AtGTR1      DS---FEEEQRKIVYRGWVMPFIIIGNETFEKLGIIIGTLSNLLVYLTSVF
AtNRT1.1    DAWDFQGRPADRSKTTGGWASAAAMILEAVERLTTLGIGVNLVYLTGTMT
CrNPF2.9    L-----LQPGH-RQKGGWITFPFIIATRLTLLTAVAGFSSNLIVYLINEF
NAXT        S-----ADSSTKRRGGGWITFPFMIATLLGLTIAAWGWLLNLIVYIEEF

AtGTR1      NLKSYTAATIINAFSGTINFGFTIAAFLCDTYFGRYKTLSSVAVIACFLGS
AtNRT1.1    HLGNATAANTVTNFLTGSFMLCLLGGFIADTFLGRYLTIAIFAAIQATGV
CrNPF2.9    NVNRIDSAQIYVNVGCMALFPLLLAIADTFLGCFNVIWISTLISLMGM
NAXT        NVKSIAAAQIANIVSGCICMVAVAATASDSFFGTIPVISVSFAFISLMGV

AtGTR1      FVILLTAAIPSLHPVACG-N-KISCEGPSVQGIQLLMLGFLVVGAGGI
AtNRT1.1    SILTLSTIIPGLRPPRCNPTTSSHCEQASGIQLTVLYLALYLTALGTGGV
CrNPF2.9    ALLTLTSSITSLRFPQCA-EGSTFCQPSAYQSSILFLALALPSIGFAGT
NAXT        ALLTLTASLDTLRPRCE-TASILCQSPSKTQLGVLYTAITLASIGTGGT

AtGTR1      RPCNLAFGADQFNPKSESGKKGINSFFNWFYFTTFAQIIISLTAVVYIQS
AtNRT1.1    KASVSGFGSDQFDETEPKERSKMTYFNNRFFFCINVGSLLAIVLVYVQD
CrNPF2.9    SFTVGTMGAHQLDDPKHQ-----ENFNWFLEIWNAAVSIIGIIVYVQD
NAXT        RFTLATAGANQEYKTKDQ-----GSFFNWFFTTYLAGAISATAIVYTED

AtGTR1      NVSWTIGLIIIPVALMFLACVIFAGDRLYVKVKA-SGSPLAGIARVIAAA
AtNRT1.1    DVGRKRWYGCAPAFIVLALSFLACTNRYRFFKL-IGSEMTQVAIVIVAA
CrNPF2.9    NVSWSGFGICVSNLLGLIIFLAGKRLYRDVQPKSSPFKDLACVVVAA
NAXT        NISWTLGFLSVAANFFSFLVFSKRFYKHDKP-LGSPFTSLLCVIFAA

AtGTR1      IKKRGLKPVKQPWNLYNHIPSN-----YANTTLK---YTDQFRFLDK
AtNRT1.1    WRNRKLELPADP--SYLDVDDIIAAEGSMKQKQLP--HTEQFRSLDK
CrNPF2.9    LSKKKLSLSNKE-EDYSELPDNAEEQQQEGVTLIPATVPDESFKFLNH
NAXT        LRKRKAVVSTNE-KDYHNES-----ITMPTKSRFFNFR

AtGTR1      AAIMTPEEKLNSDGTASDPWKLCTLQQVEEVKCIVRVPIWFASTIYYLA
AtNRT1.1    AAIRDQEAG--VTSNVFNKWTLSLTDVEEVKQIVRMLPIWATCILFWTV
CrNPF2.9    AALVTS-ADIQPDGSIKSKWKLCTVKQIEDLKTIRLPLWTTGFLLTIP
NAXT        AALKQE-DEVKPDGTIRNPRWRLCSVQVEDEFKAVIRIIPALALATIFLSTP

AtGTR1      ITIQMTYPVFQALQSDRRLGSGGFRIPAATYVVFVFLMTGMTVFIIFYDRVL
AtNRT1.1    HAQLTTLVAQSETLDRSIG--SFEIPASMAVFYVGLLTLTAVYDRVA
CrNPF2.9    MGVLSLTLQALTMDCSTF-WGLKYVPGMSVFTLLAGAISLTFIDRLI
NAXT        IAMQLSLTLVQLGVMDRRLG-PSFKIPAGSLQVITLLSTCLFIIVNDRVL

AtGTR1      VPSLRRTGLETGISLLQRIAGFTFAIMSLVSGFIEERRRNFAITKPT
AtNRT1.1    IRLCKLFNYPHGLRPLQRIGLGFFGSMAMAAALVELKRLRATAH--
CrNPF2.9    FPICRKMA---KPIRPLQRIAGHIINVISVVAIAIVEHKRLQLARAQKF
NAXT        YPFYQKLTG--KHLTFLQRVGIGHAFNLSMAVTAIVEAKRLKIVQKGFH

AtGTR1      LGMAPRTGEISSMSALWLIPLQLTLAGIAEAFAAIQMEFYKQFPENMKS
AtNRT1.1    -GP--TV-KTLPLGFYLLIPLYLIVIGIEALYTGQDFLRECPKGMKG
CrNPF2.9    QCK--TDSVVVPMVSVFLIPLQLALSTGEAFHFPQALLYYKFEFASLKS
NAXT        LGS----SSVADMSVWLFPPLVIVIGIEAFHFPGNVALCYQEFPEMSRS

AtGTR1      FAGSIFYVAGVSSYLASFLISTVHRTTAHSPGNWLAEDLNKAKLDYFY
AtNRT1.1    MSTGLLLSTALGFFSVLVTIVEKFTGK--AHPWIADDLNKGRLYNFY
CrNPF2.9    TSTAMLAIIAIGYYMGTFVIVDVRKVT-----DWLPEDINHGRLDNLY
NAXT        TATSITSVVIGICFYTSTALIDLIRTT-----AWLPDDINHGRVDNLY

AtGTR1      FMLTGLMVNMYFLLMARWYRYKGGNDEITEIETNEEETKQQQLQDKN
AtNRT1.1    WLVAVLVALNFLIFLVFSKWYVYKEKRLAEVG-IELDD-----EPSIIPM
CrNPF2.9    WLVAVLGVNLNFYLLACAGAYEYSSVMEDE-----DE-----TNDNKI
NAXT        WILVIGVNLNLGYFLVCSWLYRYRNLKDD-----DH-----KQAANV

AtGTR1      SV
AtNRT1.1    GH
CrNPF2.9    YM
NAXT        SH

```

**B**

```

CrNPF2.9
MGDTEAQLIQPGHKQKGGWITFPFIIATRLTLLTAVAGFSSNLIVYLINEFNVNRIDSAQIYVNVGCMALFPLLLA
IIADTFLGCFNVIWISTLISLMGMALLTSSITSLRPPQCAEGSTFCQPSAYQSSILFLALALPSIGFAGTSFTV
GTMGAHQLDLDPKHQENFFNWFLEIWNAAVSIIGIIVYVQDNVSWSGFGICVSNLLGLIIFLAGKRLYRDVQPK
SSPFKDLACVVVAAALSKKKLSLSNKEEDYSELPDNAEEQQQEGVTLIPATVPDESFKFLNHAALVTSADIQPDGS
IKKSWKLCTVKQIEDLKTIRLPLWTTGFLTIPMGVLSLTLQALTMDCSTFWGLKYVPGMSVFTLLAGAISL
TFIDRLIIFPICRMAKPIRPLQRIAGHIINVISVVAIAIVEHKRLQLARAQKFQKGTDSVVVPMVSVFLIPLQALS
GTGEAFHFPQALLYYKFEFASLKSSTAMLAIIAIGYYMGTFVIVDVRKVTDWLPEDINHGRLDNLYWLVAVLGV
LNFVYVYLACAGAYEYSSVMEDEDETEINDNKIYM

```

**Supplementary Figure 4.** Sequence of CrNPF2.9. **A.** Sequence alignment of AtNRT1.1/AtNPF6.3, AtGTR1/AtNPF2.10, NAXT1/AtNPF2.7 and CrNPF2.9. Highlighted in yellow is the conserved EXXE(R/K) motif implicated in proton coupling that is present in AtNRT1.1/AtNPF6.3 and AtGTR1/AtNPF2.10 and absent in both the NAXT/AtNPF2.7 and CrNPF2.9 transporters. **B.** Protein sequence of CrNPF2.9. Highlighted in yellow is the putative (D/E) $X_{3-5}L(L/I)$  motif that is predicted to act as a tonoplasmic targeting sequence.

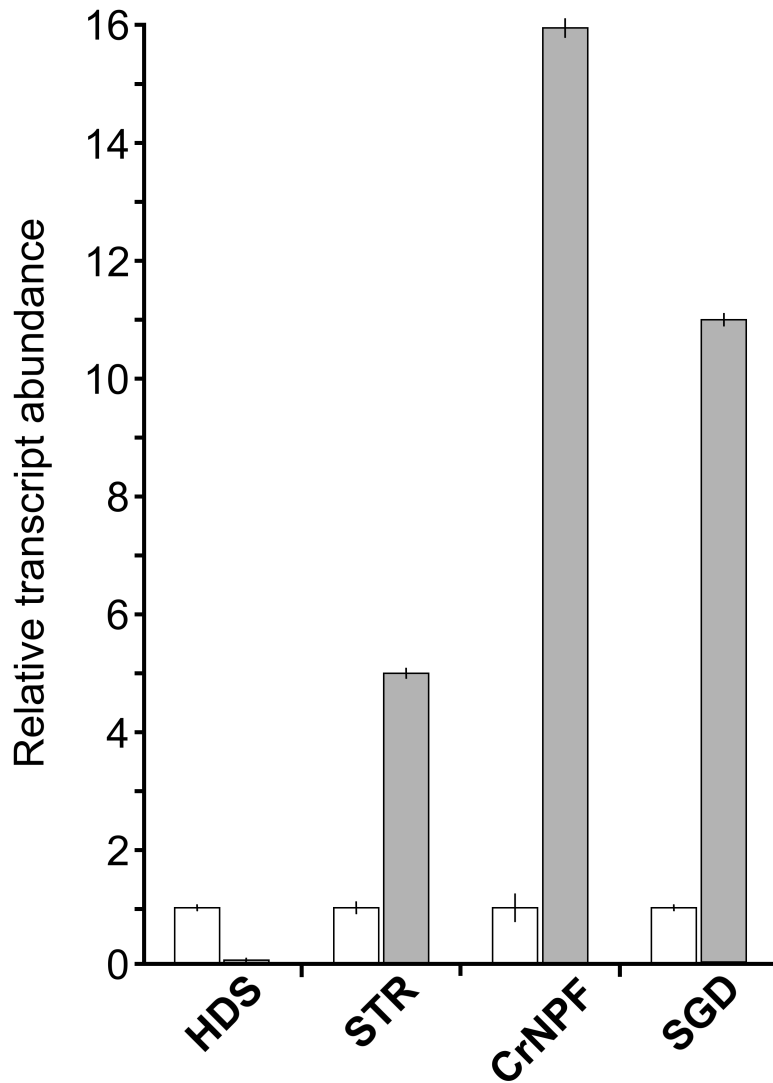

**Supplementary Fig. 5.** CrNPF2.9 is mainly expressed in leaf epidermis. Relative expression of HDS, CrNPF2.9, STR and SGD in epidermis enriched fractions of *C. roseus* leaves compared to the whole leaf fraction (HDS, hydroxymethylbutenyl 4-diphosphate synthase; STR, strictosidine synthase; SGD, strictosidine glucosidase). Epidermis enriched transcript fractions were generated by a carborundum abrasion and both fraction types were retro-transcribed before determination of gene expressions by qPCR. Transcript copy numbers were normalized using CrRPS9 and expressed relatively to the amount of transcript measured in the whole leaf fraction. Each assay was performed in triplicate, and expression measurements were performed at least twice with independent experimental replicates.

| VIGS vectors          | Name                                 | PCR target |     | Primer Sequence (5'-3')                                      |
|-----------------------|--------------------------------------|------------|-----|--------------------------------------------------------------|
| <b>Single Vectors</b> | VIGS-CrNPF2.9 Region1                | CrNPF2.9   | Fwd | GGCGCGAUCGCTTGCGGTAGCTGGATTTA                                |
|                       |                                      |            | Rev | GGTTGCGAUCCCATGACCAACTCACATTATCTTGAAC                        |
|                       | VIGS-CrNPF2.9 Region 2               | CrNPF2.9   | Fwd | GGCGCGAU GAA TAG CCA TTG GTC ACA TCA TCA ACG                 |
|                       |                                      |            | Rev | GGTTGCGAU CAA CAT CAA TAA CGA AAG TTC CCA TAT AAT ACC GAA TG |
|                       | VIGS-CrMATE1 Region1                 | CrMATE1    | Fwd | GGCGCGAU CCAAACAAAACACTATGAAATAAACCAACCACTGT                 |
|                       |                                      |            | Rev | GGTTGCGAUGTTTTGAGAATATGTAAACAAACATAATAACAATGCCTGTTA          |
| <b>Fusion Vectors</b> | VIGS-CrNPF2.9-CrMATE1 double         | CrNPF2.9   | Fwd | GGCGCGAUCGCTTGCGGTAGCTGGATTTA                                |
|                       |                                      |            | Rev | ATTCCA AU GCCACTGATTACTGAAGCAGCATT                           |
|                       |                                      | CrMATE1    | Fwd | ATTGGAAUCCAACAAAACACTATGAAATAAACCAACCACTG                    |
|                       |                                      |            | Rev | GGTTGCGAUGTTTTGAGAATATGTAAACAAACATAATAACAATGCCTGTTA          |
|                       | VIGS-CrNPF2.9-CrMATE1-CrMATE2 triple | CrNPF2.9   | Fwd | GGCGCGAUCGCTTGCGGTAGCTGGATTTA                                |
|                       |                                      |            | Rev | ATTCCA AU GCCACTGATTACTGAAGCAGCATT                           |
|                       |                                      | CrMATE1    | Fwd | ATTGGAAUCCAACAAAACACTATGAAATAAACCAACCACTG                    |
|                       |                                      |            | Rev | ACAAACAU AAT AAC AAT GCC TGT TAG GGT TAG AAG AAT TG          |
|                       |                                      | CrMATE2    | Fwd | ATGTTTGU TGG ACA GAC CTT GAA GCT GG                          |
|                       |                                      |            | Rev | GGTTGCGAU ATCCCCTGGCAACACCTG                                 |

**Supplemental Table 1.** Primers for VIGS constructs.



|                     | Primer Name   | PCR Target              | Sequence (5'-3')                      |
|---------------------|---------------|-------------------------|---------------------------------------|
| <b>qPCR primers</b> | qCrNPF2.9_Fwr | CrNPF2.9                | AAGAAGCTCTCCTTGTCAAACAAAGAAGAAG       |
|                     | qCrNPF2.9_Rev | CrNPF2.9                | CTTGAAACTTTCATCAGGTACAGTAGCAGG        |
|                     | qCrMATE1_Fwr  | CrMATE1                 | CCG GTG TTG CTG TTG GAT GT            |
|                     | qCrMATE1_Rev  | CrMATE1                 | CAAGTT TGA AGT AGA ACC CAA GAA GTG CA |
|                     | qCrMATE2_Fwr  | CrMATE2                 | CTT GAA CTT GCC GCT GCA AAT CTT       |
|                     | qCrMATE2_Rev  | CrMATE2                 | CCT TGT CCA CAC AAA CTT TCC AGT GC    |
|                     | qRps9_Fwr     | 40S ribosomal protein 9 | TTG AGC CGT ATC AGA AAT GC            |
|                     | qRps9_Rev     | 40S ribosomal protein 9 | CCC TCA TCA AGC AGA CCA TA            |

**Supplemental Table 2.** Primers for qPCR.

| Oocyte primers                                             | Primer Name         | PCR Target | Sequence (5'-3')                                                        |
|------------------------------------------------------------|---------------------|------------|-------------------------------------------------------------------------|
| <b>pNB1u vector</b>                                        | CrNPF2.9_pNB1u_Fwrd | CrNPF2.9   | GGCTTAAU ATG GGA GAC ACC GAA GCA C                                      |
|                                                            | CrNPF2.9_pNB1u_Rev  | CrNPF2.9   | GGTTTAAU TTA CAT ATA TAT TTT ATT ATC ATT TGT TTC ATC<br>TTC ATC CTC CAT |
| <b>Primers to generate<br/>template for cRNA synthesis</b> | T3T7_pNB1u_Fwrd     | CrNPF2.9   | AATTAACCCCTCACTAAAGGGTTGTAATACGACTCACTATAGGG                            |
|                                                            | 3'UTR_pNB1u_Rev     | CrNPF2.9   | TTTTTTTTTTTTTTTTTTTTTTTTTTTTTATACTCAAGCTAGCCTCGA<br>G                   |

**Supplemental Table 3.** Primers for *Xenopus laevis* expression constructs.

| Localization primers   | Primer Name        | PCR Target                | Sequence (5'-3')                                      |
|------------------------|--------------------|---------------------------|-------------------------------------------------------|
| <b>pSCA_YFP vector</b> | CrNPF2.9_YFP_Fwrd  | CrNPF2.9                  | CTGAGAACTAGTATGGGAGACACCGAAGCAC                       |
|                        | CrNPF2.9_YFP_Rev   | CrNPF2.9                  | CTGAGAACTAGTTTACATATATATTTTATTATCATTTGTTTCATCTTCATCCT |
|                        | CrMATE1_YFP_Fwrd   | CrMATE1                   | CTGAGAACTAGTATGGGTTCCAAACAAAACACTATGAAATA             |
|                        | CrMATE1_YFP_Rev    | CrMATE1                   | CTGAGAACTAGTTTCATTGGACAAGATTTTGGCT                    |
| <b>pSCA_CFP vector</b> | TPK_Fwrd           | AT5G55630                 | CTGAGAACTAGTATGTCGAGTGATGCAGCTCGTAC                   |
|                        | TPK_Rev            | AT5G55630                 | CTGAGAACTAGTCCAGATCCCCTTTGAATCTGA                     |
| <b>qPCR primers</b>    | qCrMATE1_loc_Fwrd  | CrMATE1                   | CGGTATGATTGGTGGGACATTGAT                              |
|                        | qCrMATE1_loc_Rev   | CrMATE1                   | ATTCGGGGATATCTGTTGAAAACTT                             |
|                        | qCrMATE2_loc_Fwrd  | CrMATE2                   | GCTTGTGGGCTCTTGTACTTTCAT                              |
|                        | qCrMATE2_loc_Rev   | CrMATE2                   | TGTCCCCTTAAAAATCCCAACAATA                             |
|                        | qCrNPF2.9_loc_Fwrd | CrNPF2.9                  | TGTATTATCTTGCTTGCTGGGG                                |
|                        | qCrNPF2.9_loc_Rev  | CrNPF2.9                  | GAAATTGGGATAGTATAACTATATAACC                          |
|                        | qSTR_loc_Fwrd      | Strictosidine synthase    | CATAGCTCTGTGGGTATATTAGTGT                             |
|                        | qSTR_loc_Rev       | Strictosidine synthase    | CATAGCTCTGTGGGTATATTAGTGT                             |
|                        | qSGD_loc_Fwrd      | Strictosidine glucosidase | CTTCGACAACCTCGAATGGAA                                 |
|                        | qSGD_loc_Rev       | Strictosidine glucosidase | CTTCTTGACTAACTCAACTAGT                                |
|                        | qHDS_loc_Fwrd      | HDS (MEP pathway)         | GTCCCTTACTGAACCTCCAGAG                                |
|                        | qHDS_loc_Rev       | HDS (MEP pathway)         | AATCACCTGTCCTGCGTTGG                                  |
|                        | qRps9_loc_Fwrd     | 40S Ribosomal protein S9  | TTACAAGTCCCTTCGGTGGT                                  |
|                        | qRps9_loc_Rev      | 40S Ribosomal protein S9  | TGCTTATTCTTCATCCTCTTCATC                              |

**Supplemental Table 4.** Primers for *Catharanthus roseus* localization constructs and analysis of transcript distribution.
